# Supplementary material
Source: PubMed Central journal article supplement (PMC6391665)
Supplement: ba027417-suppl1.pdf [file ba027417-suppl1.pdf]

Supplementary Table S1: Systemic HLH and inflammatory evaluation prior to diagnosis

| Patient                                             | 1     | 2     | 3     | 4<br>(prior to diagnosis) | 4<br>(at relapse) |
|-----------------------------------------------------|-------|-------|-------|---------------------------|-------------------|
| Fever >38.0° C                                      | None  | None  | None  | None                      | None              |
| Splenomegaly                                        | None  | None  | None  | None                      | None              |
| Hemoglobin, lowest<br>(g/dL)                        | 12.3  | 12.1  | 11.5  | 9.3                       | 9.6               |
| Platelet count, lowest<br>(x10 <sup>3</sup> per µL) | 176   | 198   | 175   | 248                       | 193               |
| Absolute neutrophil count,<br>lowest (per µL)       | 2,850 | 1,020 | 2,800 | 2,280                     | 1,710             |
| Ferritin, highest<br>(ng/mL)                        | 36.5  | 71.9  | 31    | 20.8                      | 281.7             |
| Fibrinogen, lowest<br>(mg/dL)                       | 407   | 365   | 242   | 443                       | 192               |
| Triglycerides, highest<br>(mg/dL)                   | 56    | 52    | 124   | 99                        | 62                |
| Soluble IL-2 receptor<br>(unit/mL, normal <1100)    | 265   | 710   | 647   | 209                       | 519               |
| Erythrocyte sedimentation<br>rate (mm/hr)           | 7     | 12    | 7     | 5                         | 8                 |
| C-reactive protein<br>(mg/dL)                       | 0.17  | 0.5   | <0.03 | <0.03                     | 0.11              |
